# Supplementary material for: Evidence for new C-terminally truncated variants of α- and β-tubulins
Source: PubMed Central journal article supplement — Mol Biol Cell. 2016 Feb 15;27(4):640–53. doi: 10.1091/mbc.E15-03-0137 (PMC4750924; doi:10.1091/mbc.e15-03-0137), 2016-02-15

# Supplemental Materials

*Molecular Biology of the Cell*

Chrystelle et al.

## SUPPLEMENTAL MATERIAL

### Supplemental figure legends.

**Figure S1.**  $\alpha\Delta3$ -tubulin is present in all regions of adult mouse brain. Equal quantities of proteins extracted from various regions of neonate mouse brain were subjected to immunoblot for analysis of  $\alpha\Delta3$ -tubulin presence (with 3EG antibody). Protein levels were controlled using  $\alpha$ tot antibody.

**Figure S2.** Immunoblots for quantitative analysis of  $\alpha$ -tubulin variants in mouse brain. Proteins extracts from neonate and adult mice brains were co-analyzed with extracts from HEK293T cells transfected with mCherry- $\alpha$ -tubulin variants, including tyrosinated, detyrosinated,  $\alpha\Delta2$  and  $\alpha\Delta3$ .  $\alpha$  tot antibody was used to control loading of cell extracts and mCherry tubulin variant (95kDa) expression levels.

**Figure S3.** Cleavage of mCherry- $\alpha$ deTyr-tubulin by CCP1 and CCP5 enzymes. Immunoblots of protein extracts from HEK293T cells co-expressing mCherry- $\alpha$ deTyr-tubulin and the CCP enzymes.  $\alpha$ tot antibody was used to control the expression level of mCherry- $\alpha$ deTyr-tubulin (95kDa) in cells. mCherry tubulin variants produced from the detyrosinated form were analyzed.

**Figure S4.** Presence of the lower band stained by 3EG in purified tubulin preparations. Immunoblot of tubulin purified from adult and neonate brains and the corresponding Coomassie-stained gel (bottom). Tubulin monomers are indicated by arrows. Tubulin preparation was performed by tissue homogenisation in 100 mM Pipes, 1 mM  $MgCl_2$ , 1 mM EGTA followed by a cycle of microtubule assembly and disassembly.

**Figure S5.**  $\beta\Delta4$ -tubulin evidenced in fibroblasts. Immunocytochemistry of murine embryonic fibroblasts using 3EG and  $\beta$ tot antibodies. Scale bar, 10  $\mu$ M.

**Figure S6.** Distribution of  $\alpha$ tubulin variants in 2DIV hippocampal neurons. (A) Immunofluorescence images of microtubules bearing  $\alpha\Delta3$  and  $\beta\Delta4$ -tubulin (3EG-positive microtubules),  $\alpha\Delta2$ -,  $\alpha$ deTyr- and  $\alpha\Delta$ Tyr-tubulin in the neurons. Scale bar = 10  $\mu$ m. (B) Quantitative analysis (mean  $\pm$  SEM) of immunofluorescence signals of microtubules from axon shafts and from growth cones. Variant signal ( $F_{variant}$ ) was normalized to  $\alpha$ tot signal ( $F_{\alpha tot}$ , which is an index of the remaining microtubules) and plotted in gray values (\*\*\*) :  $P < 0.001$ , (\*) :  $P < 0.1$  with a  $t$  test. The 3EG immunoreactivity, including both  $\alpha\Delta3$ - and  $\beta\Delta4$ -tubulin, is bright throughout hippocampal neurons. It is even intense on microtubules present in the growth cone, like the  $\alpha$ Tyr staining (see growth cone's magnifications). In contrast,  $\alpha$ deTyr- and  $\alpha\Delta2$ -microtubular staining significantly decrease at the transition zone between axon and beginning of growth cone (see quantifications in B). Growth cones contain however detectable amounts of  $\alpha\Delta2$ -tubulin which seem not associated to microtubules. Comparable results were already described for  $\alpha$ Tyr-,  $\alpha$ deTyr- and  $\alpha\Delta2$ -signals with rat cerebellar neurons (Arregui *et al.*, 1991; Paturle-Lafanechere *et al.*, 1994).

## Supplemental Tables

**Table S1.** Quantitative analysis of figure 1A. Western-blot of mCherry-tubulin variants expressed in HEK293T were analyzed using ImageJ. Each mCherry-tubulin variant signal was normalized to  $\alpha$ tot signal and was then plotted as percent (with the sum of the variants signals corresponding to 100%). Signals obtained with the mCherry- $\alpha$ deTyr extract using  $\alpha$ Tyr and  $\alpha\Delta 2$  antibodies very probably correspond to processing of the expressed protein in HEK293T cells and not to cross-reactions of antibodies. (\*) Signal observed with mChe- $\alpha$ deTyr extract using  $\alpha$ Tyr antibody is due to the addition of a tyrosine on the expressed protein by the endogenous TTL of HEK293T cells, generating mCherry- $\alpha$ Tyr variant.  $\alpha$ Tyr antibody was indeed shown to be highly specific using purified proteins (Bosson *et al.*, 2012). (\*\*) Signal observed with mCherry- $\alpha$ deTyr extract using  $\alpha\Delta 2$  antibody also very probably results from processing of the last glutamate of the expressed protein by an endogenous CCP of HEK293T cells, generating mCherry- $\alpha\Delta 2$  variant.

|                  | mChe- $\alpha$ Tyr | mChe- $\alpha$ deTyr | mChe- $\alpha\Delta 2$ | mChe- $\alpha\Delta 3$ |
|------------------|--------------------|----------------------|------------------------|------------------------|
| $\alpha$ Tyr     | <b>84.08</b>       | <b>15.91*</b>        | -                      | <b>0.01</b>            |
| $\alpha$ deTyr   | -                  | <b>95.22</b>         | <b>0.53</b>            | <b>4.25</b>            |
| $\alpha\Delta 2$ | <b>0.13</b>        | <b>10.46**</b>       | <b>89.37</b>           | <b>0.04</b>            |
| $\alpha\Delta 3$ | -                  | <b>0.17</b>          | <b>1.66</b>            | <b>98.17</b>           |

**Table S2 - Primary antibodies used in this study**

| Antibody name                                                | Antigen or epitope                               | Dilutions       |                       | Type                                       | Provider                                               |
|--------------------------------------------------------------|--------------------------------------------------|-----------------|-----------------------|--------------------------------------------|--------------------------------------------------------|
|                                                              |                                                  | immuno blotting | immuno cyto-chemistry |                                            |                                                        |
| $\alpha$ tot ( $\alpha 3a$ )                                 | Epitope: DMAALE (see <a href="#">figure 1B</a> ) | 1:10,000        | 1:8000                | mouse monoclonal                           | (Erck et al., 2005) Kind gift of L Lafanechère         |
| $\beta$ tot ( $\beta 3a$ )                                   | Epitope: EYQQYQ (see <a href="#">figure 4C</a> ) | 1:10,000        | 1:1,000               | mouse monoclonal                           | Kind gift of L Lafanechère                             |
| Anti-Tyr tubulin (YL1/2)                                     |                                                  | 1:10,000        | 1:5,000-1:6000        | rat monoclonal                             | (Wehland and Willingham, 1983)                         |
| anti-deTyr-tubulin                                           | KLH-CGEEEGEE-COOH*                               | 1:10,000        | 1:500                 | rabbit polyclonal or guinea pig polyclonal | our own production, (Paturle-Lafanechere et al., 1994) |
| anti- $\Delta 2$ -tubulin                                    | KLH-CEGEEEGE-COOH*                               | 1:10,000        | 1:800                 | rabbit polyclonal                          | our own production, (Paturle-Lafanechere et al., 1994) |
| 3EG (anti- $\alpha\Delta 3$ and $\beta$ -truncated tubulins) | KLH-CEE GEEEG-COOH*                              | 1:10,000        | 1:500-1:1,000         | rabbit polyclonal                          | see Material and Methods                               |
| anti-GFP                                                     | GFP                                              | 1:5,000         |                       | rabbit polyclonal                          | Invitrogen                                             |
| Anti-mCherry                                                 | mCherry                                          |                 | 1:1,000               | mouse monoclonal                           | Clontech                                               |
| H3-ser10P                                                    | Histone H3 (phospho S10)                         | 1:2,500         |                       | rabbit polyclonal                          | Abcam                                                  |

\*KLH: keyhole limpet hemocyanin

**Table S3 - Primers used to mutagenize  $\alpha$ 1B tubulin cDNAs fused to mCherry.**

Forward primer was GGCCATCTATGACATCTGTCG and reverse primers are listed below. Restriction sites used for the cloning are in bold, substituted nucleotides are underlined, non-coding sequences are in lower case and stop codon is in red.

| cDNA                                | Reverse PCR primer                                                                         |
|-------------------------------------|--------------------------------------------------------------------------------------------|
| mCherry $\alpha$ tub                | Template plasmid - $\alpha$ 1B tubulin cloned into pcDNA3.1-mCherry<br>Gift from F. Saudou |
| mCherry $\alpha$ deTyr              | cgccctcgaggatc <b>ctta</b> TTCCTCTCCTTCTTCCTCACC                                           |
| mCherry $\alpha$ $\Delta$ 2         | cgccctcgaggatc <b>ctta</b> CTCTCCTTCTTCCTCCCCCT                                            |
| mCherry $\alpha$ $\Delta$ 3 (GEEEG) | cgccctcgaggatc <b>ctta</b> TCCTTCTTCCTCACCTCTCC                                            |
| mCherry $\alpha$ $\Delta$ 3-GEDEG   | cgccctcgaggatc <b>ctta</b> TCCTTCATCCTCACCTCTCCTTCAAC                                      |
| mCherry $\alpha$ $\Delta$ 3-GENEG   | cgccctcgaggatc <b>ctta</b> TCCTTCGTTCTCACCTCTCCTTCAACAG                                    |
| mCherry $\alpha$ $\Delta$ 3-GAEEG   | cgccctcgaggatc <b>ctta</b> TCCTTCTTCAGCACCTCTCCTTCAACAGAAT                                 |
| mCherry $\alpha$ $\Delta$ 3-GDDEG   | cgccctcgaggatc <b>ctta</b> TCCTTCATCATCACCTCTCCTTCAACAGAA                                  |
| mCherry $\alpha$ $\Delta$ 3-AEEEG   | cgccctcgaggatc <b>ctta</b> TCCTTCTTCCTCAGCCTCTCCTTCAACAGAATCCA                             |
| mCherry $\alpha$ $\Delta$ 3-EEEEG   | cgccctcgaggatc <b>ctta</b> TCCTTCTTCCTCTTCCTCTCCTTCAACAGAATCCA                             |

**Supplemental references.**

- Arregui, C., Busciglio, J., Caceres, A., and Barra, H.S. (1991). Tyrosinated and detyrosinated microtubules in axonal processes of cerebellar macroneurons grown in culture. *Journal of neuroscience research* 28, 171-181.
- Bosson, A., Soleilhac, J.M., Valiron, O., Job, D., Andrieux, A., and Moutin, M.J. (2012). Cap-Gly proteins at microtubule plus ends: is EB1 detyrosination involved? *PLoS One* 7, e33490.
- Erck, C., Peris, L., Andrieux, A., Meissirel, C., Gruber, A.D., Vernet, M., Schweitzer, A., Saoudi, Y., Pointu, H., Bosc, C., Salin, P.A., Job, D., and Wehland, J. (2005). A vital role of tubulin-tyrosinase for neuronal organization. *Proceedings of the National Academy of Sciences of the United States of America* 102, 7853-7858.
- Paturle-Lafanechere, L., Manier, M., Trigault, N., Pirollet, F., Mazarguil, H., and Job, D. (1994). Accumulation of delta 2-tubulin, a major tubulin variant that cannot be tyrosinated, in neuronal tissues and in stable microtubule assemblies. *Journal of cell science* 107 (Pt 6), 1529-1543.
- Wehland, J., and Willingham, M.C. (1983). A rat monoclonal antibody reacting specifically with the tyrosylated form of alpha-tubulin. II. Effects on cell movement, organization of microtubules, and intermediate filaments, and arrangement of Golgi elements. *The Journal of cell biology* 97, 1476-1490.

Figure S1

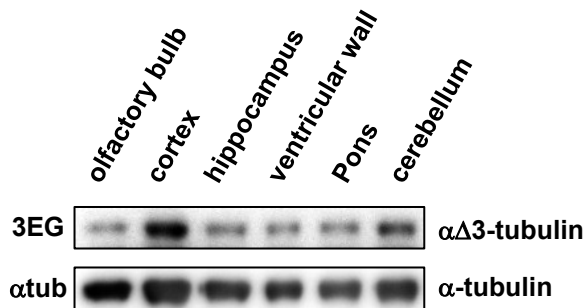

Figure S2

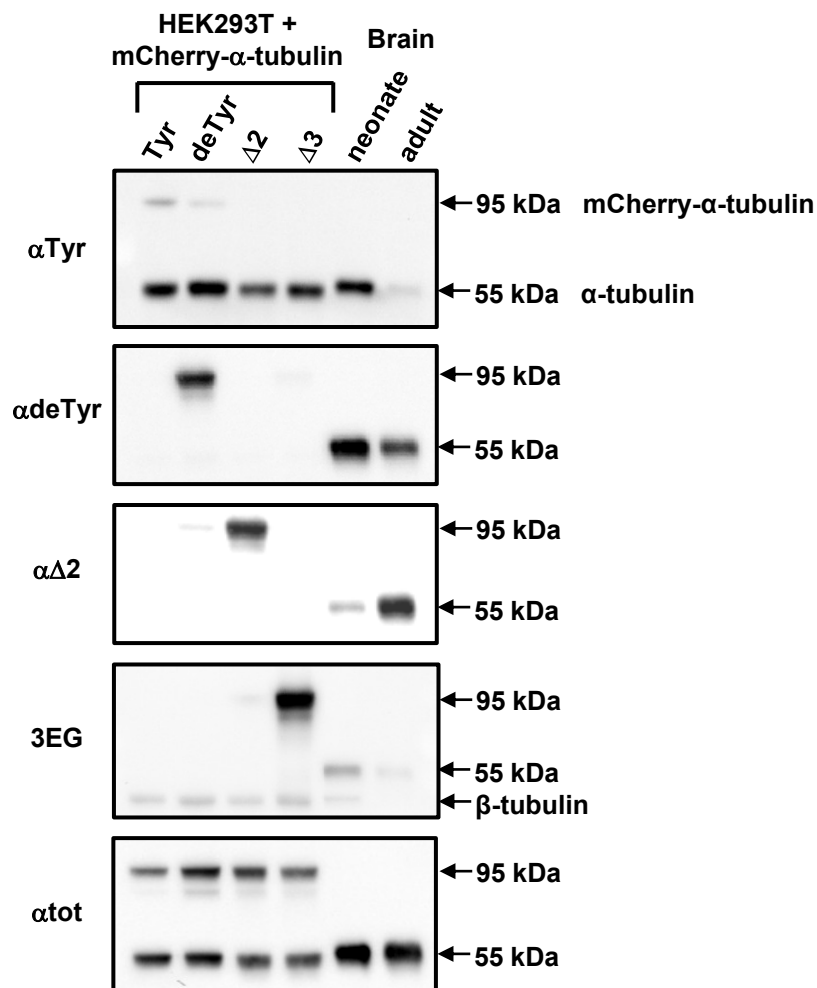

Figure S3

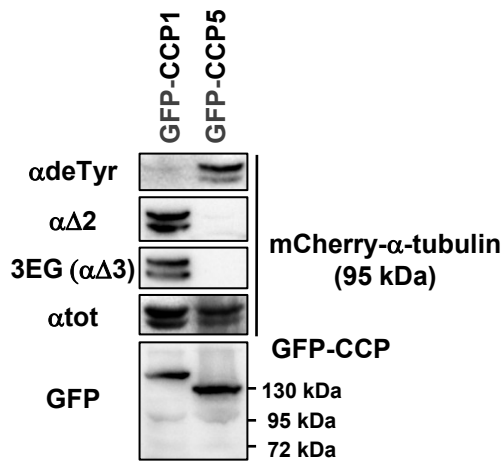

Figure S4

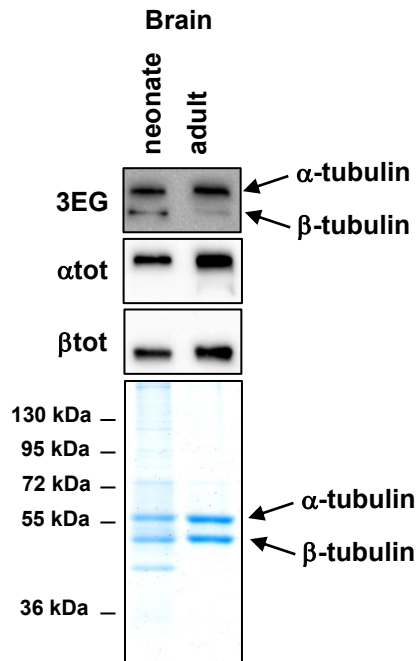

Figure S5

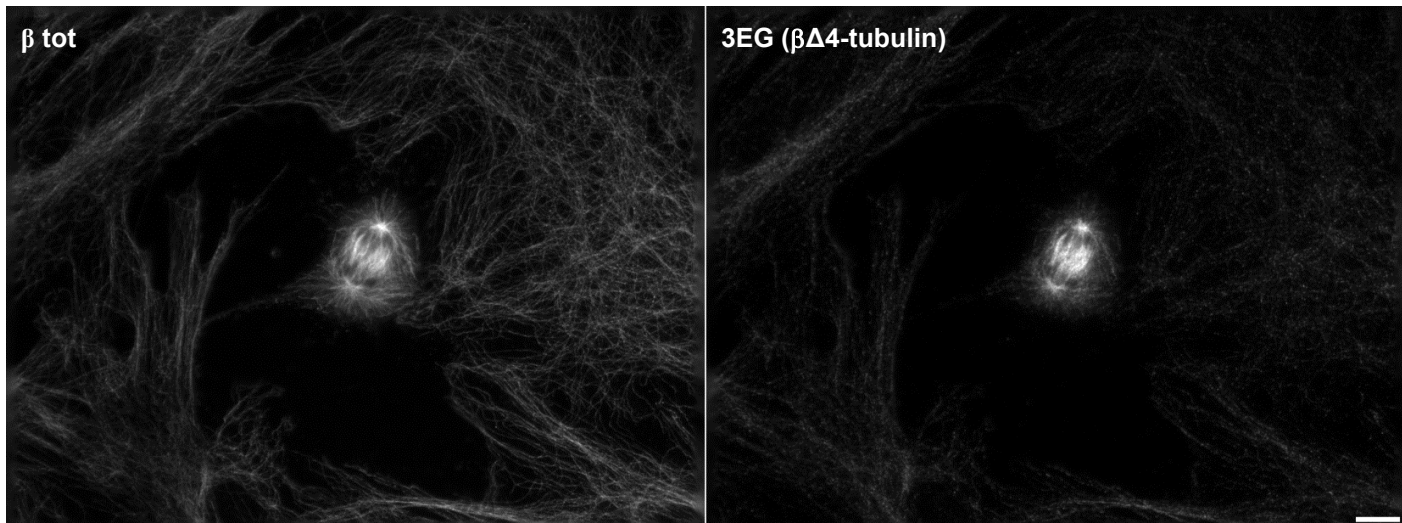

**Figure S6**

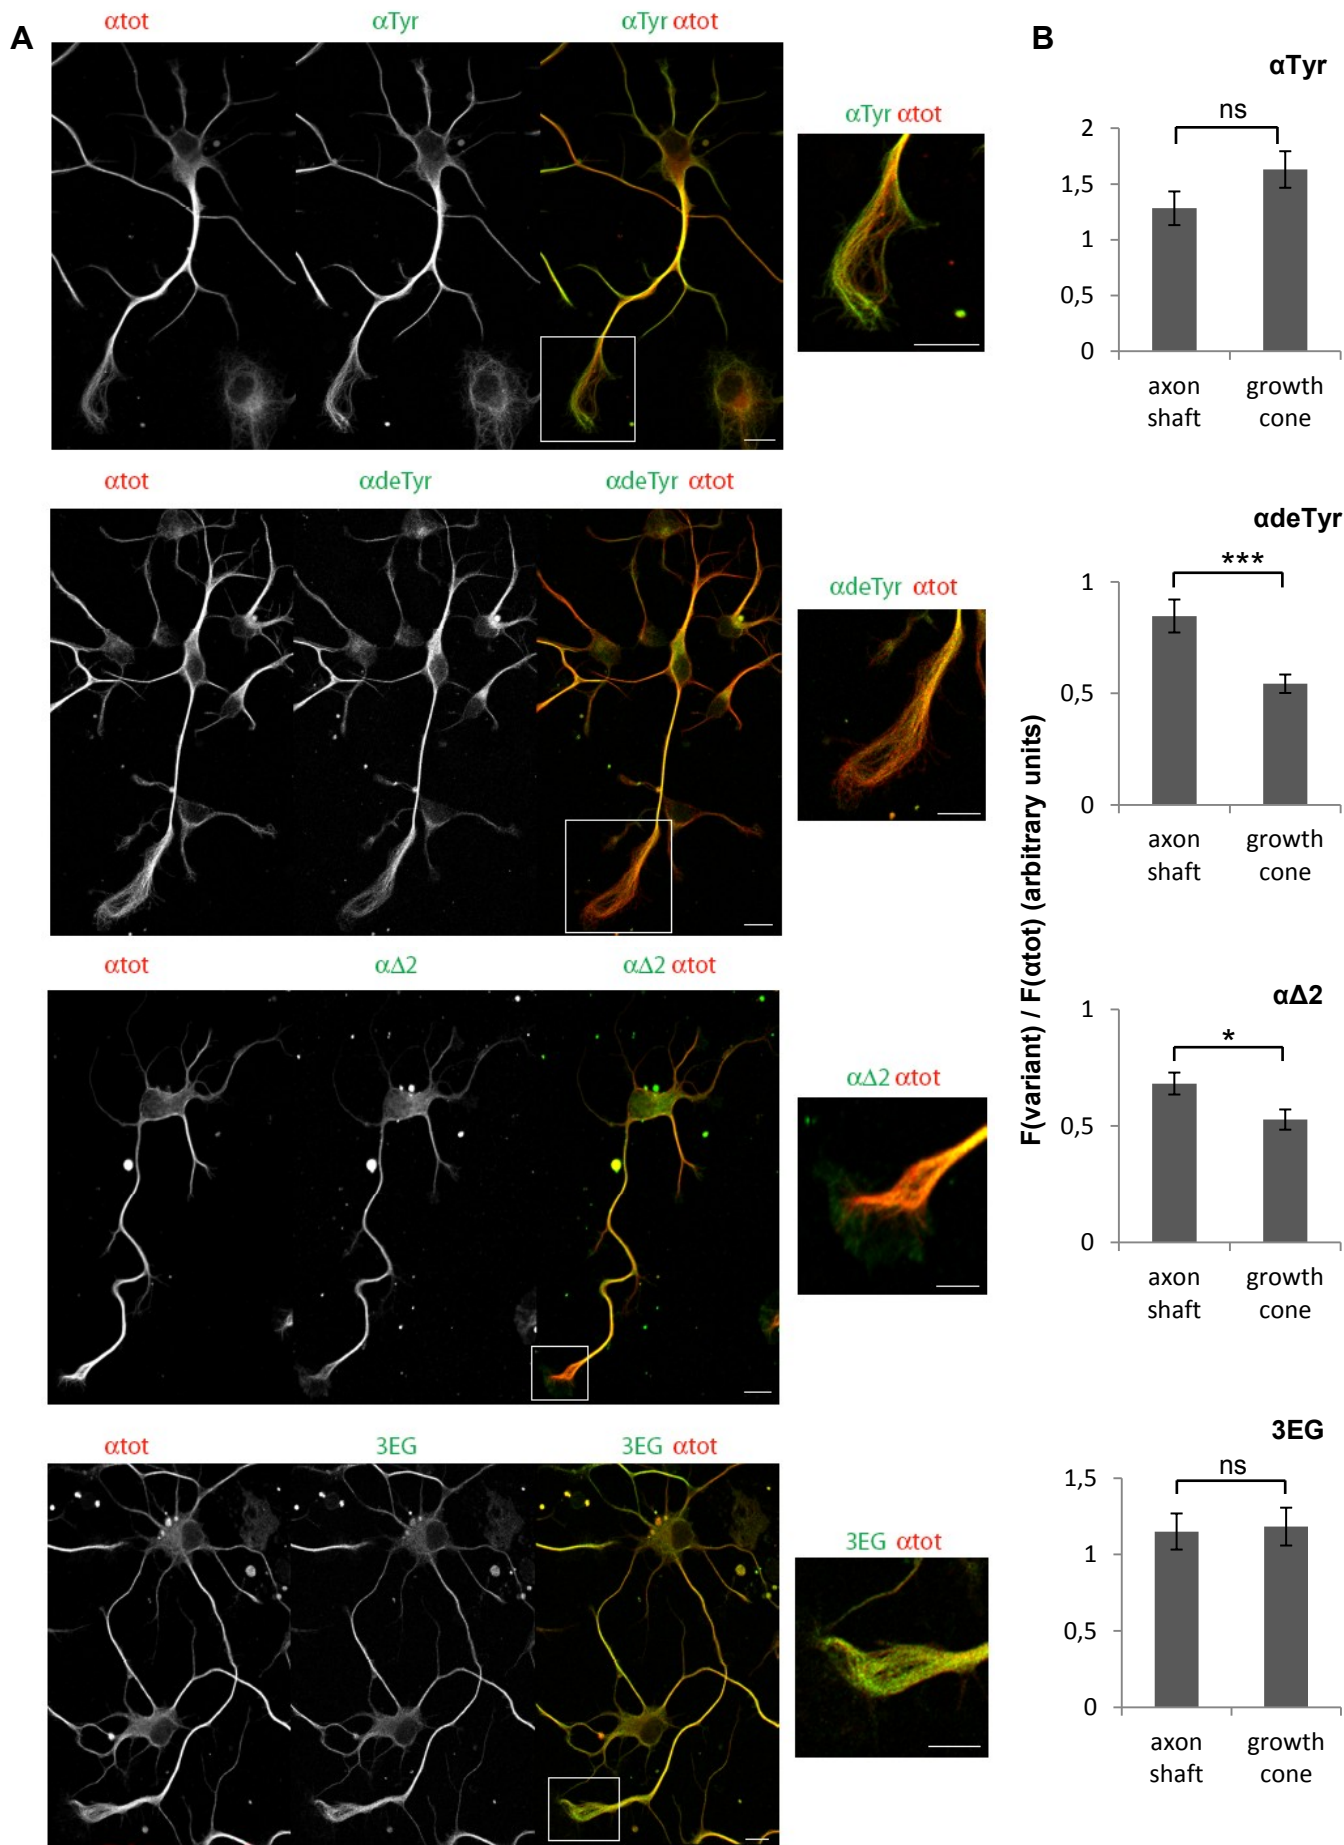

Supplement: supp_E15-03-0137v1_E15-03-0137revisedSupp.pdf [file supp_E15-03-0137v1_E15-03-0137revisedSupp.pdf]
